# Supplementary material for: Placental Volume and Uterine Artery Doppler in Pregnancy Following In Vitro Fertilization: A Comprehensive Literature Review
Source: MDPI journal article supplement (doi:10.3390/jcm11195793), 2022-09-29
Supplement: s1 [file s1]

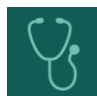

Review

# Placental Volume and Uterine Artery Doppler in Pregnancy Following In Vitro Fertilization: A Comprehensive Literature Review

Serena Resta, Gaia Scandella, Ilenia Mappa, Maria Elena Pietrolucci, Pavjola Maqina and Giuseppe Rizzo \*

Università di Roma Tor Vergata, Department of Obstetrics and Gynecology, Fondazione Policlinico Tor Vergata, Viale Oxford 81 00133 Roma, Italy

\* Correspondence: [giuseppe.rizzo@uniroma2.it](mailto:giuseppe.rizzo@uniroma2.it)

**Citation:** Resta, S.; Scandella, G.; Mappa, I.; Pietrolucci, M.E.; Maqina, P.; Rizzo, G. Placental Volume and Uterine Artery Doppler in Pregnancy Following In Vitro Fertilization: A Comprehensive Literature Review. *J. Clin. Med.* **2022**, *11*, 5793.

<https://doi.org/10.3390/jcm11195793>

Academic Editors: Aldo E. Calogero and Claudio Manna

Received: 16 September 2022

Accepted: 27 September 2022

Published: 29 September 2022

**Publisher's Note:** MDPI stays neutral with regard to jurisdictional claims in published maps and institutional affiliations.

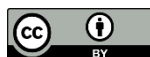

**Copyright:** © 2022 by the authors.

Licensee MDPI, Basel, Switzerland.

This article is an open access article distributed under the terms and conditions of the Creative Commons Attribution (CC BY) license (<https://creativecommons.org/licenses/by/4.0/>).

**Supplementary Material: Characteristics of the studied considered**

|                        |             |                                                |                |                           | UtA-PI                                                              |                                |             | PV                                                                               |             |                                     | uPVV          |     |               |
|------------------------|-------------|------------------------------------------------|----------------|---------------------------|---------------------------------------------------------------------|--------------------------------|-------------|----------------------------------------------------------------------------------|-------------|-------------------------------------|---------------|-----|---------------|
|                        |             |                                                |                |                           | IVF                                                                 |                                |             | IVF                                                                              |             |                                     | IVF           |     |               |
| Study                  | Country     | Study Design                                   | N of patients  | ART technique distinction | Fresh embryo                                                        | FET                            | Control     | Fresh embryo                                                                     | FET         | Control                             | Fresh embryo  | FET | Control       |
| Rifouna et al. 2014    | Netherlands | Retrospective cohort study                     | 154 (70 IVF)   | Y Fresh/FET embryos       | N/A                                                                 |                                |             | 42.7, SD 15.9                                                                    |             | 41.2, SD 13.9                       | 27.6, SD 16.9 |     | 24.8, SD 19.9 |
| Rizzo et al. 2016      | Italy       | Prospective study                              | 914(416 IVF)   | Y autologus/donor         | Autologus: 1.1 (IQR 0.7-1.5)<br>Donor: 1 (IQR 0.8-1.4) <sup>+</sup> | 1.00 (IQR0.7-1.4) <sup>+</sup> |             | Autologous: 0.80 (IQR, 0.50–1.10)<br>donor: 0.63 (IQR, 0.40 – 0.80) <sup>+</sup> |             | 1.04 (IQR), 0.81–1.22) <sup>+</sup> | N/A           |     |               |
| Sundheimer et al. 2018 | USA         | Retrospective cohort study                     | 3613 (427 IVF) | N IVF/ non-IVF techniques | N/A                                                                 |                                |             | IVF+nIVF: 56.6 ± 32.9                                                            |             | 55.2 ± 32.6                         | N/A           |     |               |
| Choux et al. 2019      | France      | Retrospective single-centre case-control study | 252(84 IVF)    | Y Fresh/FET embryos       | 1.86 ± 0.64 °                                                       | 1.26 ± 0.44°                   | 1.52± 0.59* | 4.40 ± 0.283                                                                     | 4.38 ± 0.37 | 4.52 ± 0.39                         | N/A           |     |               |
| Cavoretto et al. 2020  | Italy       | Prospective longitudinal study                 | 367 IVF        | Y Fresh/FET embryos       | 1.00 ± 0.29 **                                                      | 0.86 ± 0.28 **                 | N/A         | N/A                                                                              |             |                                     | N/A           |     |               |

|                       |             |                          |              |                        |                                |                                |           |                               |                               |           |                                |                               |           |
|-----------------------|-------------|--------------------------|--------------|------------------------|--------------------------------|--------------------------------|-----------|-------------------------------|-------------------------------|-----------|--------------------------------|-------------------------------|-----------|
|                       |             |                          |              |                        |                                |                                |           |                               |                               |           |                                |                               |           |
| Van Duijn et al. 2021 | Netherlands | Prospective cohort study | 214 (88 IVF) | Y<br>Fresh/FET embryos | $\beta$ -0.148 (-0.304, 0.009) | $\beta$ -0.112 (-0.305, 0.080) | Reference | $\beta$ 0.003 (-0.127, 0.134) | $\beta$ 0.002 (-0.160, 0.163) | Reference | $\beta$ -0.052 (-0.207, 0.103) | $\beta$ 0.071 (-0.121, 0.263) | Reference |

<sup>°</sup>p <0.05, \*p <0.001, FET: frozen-thawed embryo transfer, + MoM.
